# Supplementary material
Source: PubMed Central journal article supplement (PMC3786328)
Supplement: NIHMS469486-supplement-1.pdf [file NIHMS469486-supplement-1.pdf]

## Supplementary webappendix

This webappendix formed part of the original submission and has been peer reviewed. We post it as supplied by the authors.

Supplement to: Amaratunga C, Sreng S, Suon S, et al. Artemisinin-resistant *Plasmodium falciparum* in Pursat province, western Cambodia: a parasite clearance rate study. *Lancet Infect Dis* 2012; published online Aug 30. [http://dx.doi.org/10.1016/S1473-3099\(12\)70181-0](http://dx.doi.org/10.1016/S1473-3099(12)70181-0).

## APPENDIX MATERIAL

### **Artemisinin-resistant *Plasmodium falciparum* malaria in Pursat province, western Cambodia: a parasite clearance rate study**

Chanaki Amaratunga, Sokunthea Sreng, Seila Suon, Erika S. Phelps, Kasia Stepniewska, Pharath Lim, Chongjun Zhou, Sivanna Mao, Jennifer M. Anderson, Niklas Lindegardh, Hongying Jiang, Jianping Song, Xin-zhuan Su, Nicholas J. White, Arjen M. Dondorp, Tim J. C. Anderson, Michael P. Fay, Jianbing Mu, Socheat Duong, and Rick M. Fairhurst

#### Contents:

Appendix 1: Summary of screening activities.

Appendix 2: Venn diagram showing the distributions of erythrocyte polymorphisms in 168 Cambodian patients with uncomplicated *P. falciparum* malaria enrolled in 2009 and 2010.

Appendix 3: Results of regression analysis of parasite clearance rate ( $T_{1/2}$ ) estimates.

Appendix 4: *Ex vivo* IC<sub>50</sub> values for antimalarial drugs, stratified by parasite clone group.

Appendix 5: Incidence of *P. falciparum* malaria per 1000 people in 2009 and 2010, by Cambodian province.

**Appendix 1: Summary of screening activities.**

| Year                               | 2009                  |                 |      | 2010                  |     |      | 2009 + 2010 |      |      |
|------------------------------------|-----------------------|-----------------|------|-----------------------|-----|------|-------------|------|------|
| Screening period                   | June 19 – November 28 |                 |      | June 25 – December 26 |     |      |             |      |      |
| Screening site                     | SP <sup>a</sup>       | SF <sup>b</sup> | All  | SP                    | SF  | All  | SP          | SF   | All  |
| <b>Total screened</b>              | 686                   | 1066            | 1752 | 802                   | 950 | 1752 | 1488        | 2016 | 3504 |
| <i>Pf</i> +                        | 136                   | 294             | 430  | 173                   | 109 | 282  | 309         | 403  | 712  |
| <i>Pf</i> 4+ or 5+ <sup>c</sup>    | 88                    | 56              | 144  | 118                   | 54  | 172  | 206         | 110  | 316  |
| <i>Pf</i> <10,000/µl               | 3                     | 3               | 6    | 9                     | 5   | 14   | 12          | 8    | 20   |
| Severe malaria                     | 22                    | 3               | 25   | 24                    | 6   | 30   | 46          | 9    | 55   |
| Age <10 years                      | 1                     | 10              | 11   | 7                     | 2   | 9    | 8           | 12   | 20   |
| Pregnant                           | 2                     | 1               | 3    | 2                     | 0   | 2    | 4           | 1    | 5    |
| Refused to participate             | 2                     | 1               | 3    | 6                     | 3   | 9    | 8           | 4    | 12   |
| Used antimalarial drug             | 13                    | 1               | 14   | 5                     | 4   | 9    | 18          | 5    | 23   |
| Chronic illness                    | 0                     | 0               | 0    | 1                     | 0   | 1    | 1           | 0    | 1    |
| Enrolled                           | 45                    | 37              | 82   | 64                    | 34  | 98   | 109         | 71   | 180  |
| Removed from analysis <sup>d</sup> | 3                     | 0               | 3    | 7                     | 2   | 9    | 10          | 2    | 12   |
| Analyzed                           | 42                    | 37              | 79   | 57                    | 32  | 89   | 99          | 69   | 168  |

<sup>a</sup> SP, Screening conducted at Sampov Meas Referral Hospital, Pursat town.

<sup>b</sup> SF, Screening performed on the main road from Pursat town to Veal Veng district.

<sup>c</sup> '4+' = 11-100 parasites, '5+' = >100 parasites per high-powered field.

<sup>d</sup> Patients were removed from analysis due to missing host genotype data.

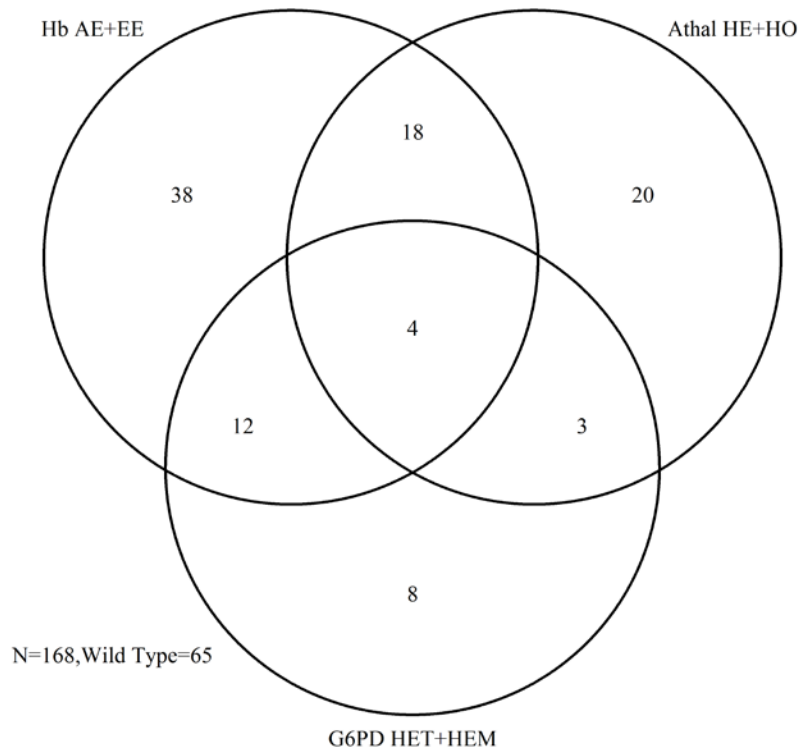

**Appendix 2: Venn diagram showing the distributions of erythrocyte polymorphisms in 168 Cambodian patients with uncomplicated *P. falciparum* malaria enrolled in 2009 and 2010. HbAE=heterozygosity for HbA and HbE; HbEE=homozygosity for HbE; Athal HE=heterozygosity for  $\alpha$ -thalassaemia; Athal HO=homozygosity for  $\alpha$ -thalassaemia; G6PD HET= heterozygosity for G6PD deficiency ('Viangchan') allele; G6PD HEM= hemizyosity for G6PD deficiency ('Viangchan') allele.**

**Appendix 3: Results of regression analysis of parasite clearance rate (half-life) estimates.**

|                                        | Estimate | Std. Error | t value | Two-sided p-value | Lower 95% Confidence Limit | Upper 95% Confidence Limit |
|----------------------------------------|----------|------------|---------|-------------------|----------------------------|----------------------------|
| <b>(Intercept)</b>                     | 5.112    | 2.274      | 2.247   | 0.027             | 0.599                      | 9.624                      |
| <b>Sex Male</b>                        | 0.958    | 0.512      | 1.873   | 0.064             | -0.057                     | 1.973                      |
| <b>Age 21+ years</b>                   | -0.211   | 0.36       | -0.588  | 0.558             | -0.925                     | 0.502                      |
| <b>Village VV or KV</b>                | -0.029   | 0.37       | -0.079  | 0.937             | -0.763                     | 0.705                      |
| <b>Hemoglobin E</b>                    | 0.551    | 0.309      | 1.781   | 0.078             | -0.063                     | 1.164                      |
| <b><math>\alpha</math>-thalassemia</b> | -0.334   | 0.375      | -0.89   | 0.376             | -1.079                     | 0.411                      |
| <b>G6PD deficiency</b>                 | 0.123    | 0.25       | 0.491   | 0.624             | -0.374                     | 0.62                       |
| <b>Ln(initial parasite density)</b>    | -0.037   | 0.208      | -0.177  | 0.86              | -0.449                     | 0.376                      |
| <b>Year 2010</b>                       | 0.680    | 0.368      | 1.847   | 0.068             | -0.051                     | 1.41                       |
| <b>Parasite Group 1</b>                | 0.790    | 0.365      | 2.164   | 0.033             | 0.066                      | 1.515                      |

Parameter estimates and related statistics from the linear model with parasite clearance  $T_{1/2}$  as the response. The intercept is the estimated  $T_{1/2}$  in hours for the reference group (Female, Age < 21 years, Village not VV or KV, Hemoglobin AA, wildtype  $\alpha$ -globin genotype, no G6PD<sup>VC</sup> genotype, Ln(initial parasite density) equal to 0, Year 2009, and Parasite Group 2). Estimates are shifts in  $T_{1/2}$  in hours for changing each variable one at a time: the binary variables are changed compared to the reference group and the Ln(initial parasite density) is changed by increasing it by one unit.

**Appendix 4: *Ex vivo* IC<sub>50</sub> values for antimalarial drugs, stratified by parasite clone group.**

|                           | Geometric mean (range) IC <sub>50</sub> (nM) |                        | p (Mann-Whitney) |
|---------------------------|----------------------------------------------|------------------------|------------------|
|                           | Group 1                                      | Group 2                |                  |
| <b>Chloroquine</b>        | 341.90 (27.64-730.00)                        | 236.30 (68.90-617.00)  | 0.1166           |
| <b>Quinine</b>            | 257.90 (95.60-668.00)                        | 362.20 (185.60-796.60) | 0.1827           |
| <b>Mefloquine</b>         | 16.46 (7.60-54.26)                           | 36.59 (18.72-71.30)    | <b>0.0007</b>    |
| <b>Dihydroartemisinin</b> | 3.14 (1.81-6.09)                             | 3.78 (1.31-9.76)       | 0.3013           |

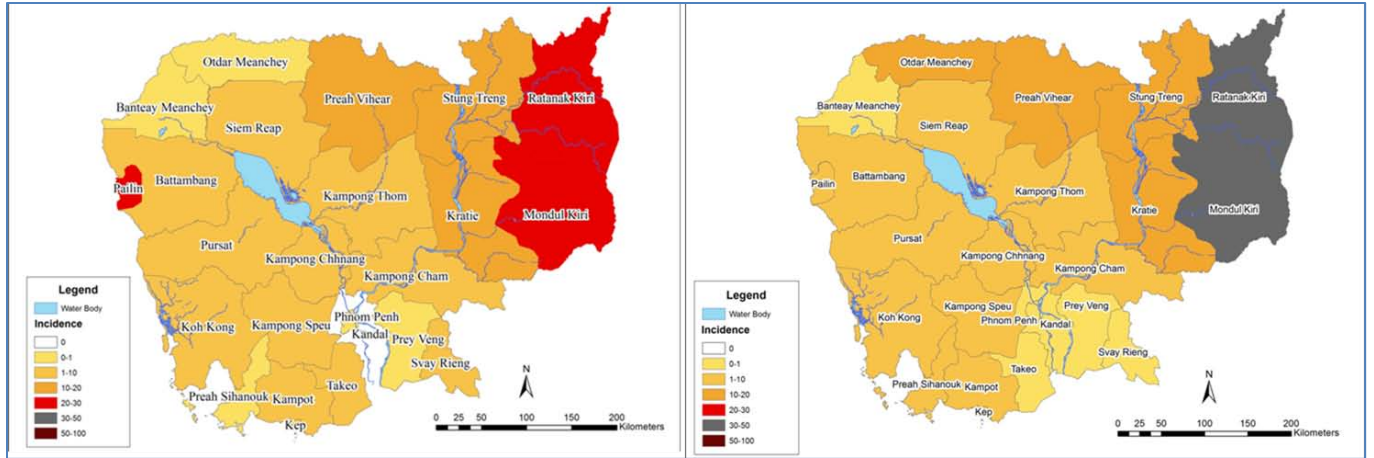

Appendix 5: Incidence of *P. falciparum* malaria per 1000 people in 2009 and 2010, by Cambodian province.
